# Supplementary material for: Can Two-Way Intergenerational Support Better Protect Cognitive Function in Chinese Older Adults? A Nationally Representative Study
Source: Research Square preprint supplement (doi:10.21203/rs.3.rs-6667791/v1), 2025-06-18
Supplement: Supplementary file 1 [file 1ae9a4b4482295f0d6f808ca.docx]

**Supplementary tables**

**Supplementary table 1. Description of the variables evaluated in this study**

| **Variable** | **Description** | **Survey questions** |
| --- | --- | --- |
| **Dependent Variable** |  |  |
| Cognitive function | No impairment=0  Mild impairment=1  Moderate impairment=2  Severe impairment=3 | Assessed by the Chinese adaptation of the Mini-Mental State Examination (MMSE) scale. |
| **Independent Variable** |  |  |
| **Financial support** |  |  |
| Provided financial support | Not provided=0  Provided =1 | Question: In the past year, how much money in cash (or in kind) did you give your children (including all grandchildren and their spouses living in the same household or not)? |
| Received financial support | Not received=0  Received=1 | Question: In the past year, how much money in cash (or in kind) did your children (including all grandchildren and their spouses living in the same household or not) give you? |
| **Intergenerational financial support** | No=0  Provided alone=1  Received alone=2  Two-way=3 | Defined as “0” when provided financial support of “0” and received financial support of “0”;  Defined as “1” when provided financial support is “1” and received financial support is “0”;  Defined as “2” when provided financial support of “0” and received financial support of “1”;  Defined as “3” when provided financial support of “1” and received financial support of “1”. |
| **Caregiving support** |  |  |
| Provided childcare | Not Provided=0  Provided =1 | Question: Are you currently engaged/participating in any of the following activities? Such as housework (cooking, childcare, etc.) |
| Received informal care | Not Received=0  Received=1 | Question: Who primarily cares for you when you are not feeling well or when you are sick? |
| **Intergenerational caregiving support** | No=0  Provided alone=1  Received alone=2  Two-way=3 | Defined as “0” when provided childcare of “0” and received informal care of “0”;  Defined as “1” when provided childcare is “1” and received informal care is “0”;  Defined as “2” when provided childcare of “0” and received informal care of “1”;  Defined as “3” when provided childcare of “1” and received informal care of “1”. |
| **Intergenerational emotional support** | No=0  Two-way=1 | Question: Who do you talk to the most in your spare time? |
